# Supplementary material
Source: MDPI journal article supplement (https://www.mdpi.com/2071-1050/15/22/16077)
Supplement: s1 [file s1]

|                                                                                                                                                                                                                                                                                               |    |
|-----------------------------------------------------------------------------------------------------------------------------------------------------------------------------------------------------------------------------------------------------------------------------------------------|----|
| Table S1 Detailed technology descriptions implemented in Plant A and Plant B product systems. ....                                                                                                                                                                                            | 2  |
| Table S2. Normalized wastewater flow rates and substance concentrations of both influent and effluent for Plant A and Plant B for scenarios 0: discharge without treatment, 1: conventional WWTPs and 2: biofactory WW-CE [1]. ....                                                           | 3  |
| Table S3. Normalized biosolid flow rates and substance concentrations for Plant A and Plant B for scenarios 0: discharge without treatment, 1: conventional WWTPs and 2: biofactory WW-CE [1]. ....                                                                                           | 4  |
| Table S4. <i>Capital investment and maintenance costs of Plant A and Plant B normalized to 1,000,000 p.e./ day for scenarios 0: discharge without treatment, 1: conventional wastewater treatment plants and 2: biofactory wastewater circular economies.</i> ....                            | 5  |
| Table S5. Integrated LCA and LCC inventories of Plant A and Plant B normalized to 1,000,000 p.e./ day for scenarios 0: discharge without treatment, 1: conventional wastewater treatment plants and 2: biofactory wastewater circular economies. ....                                         | 6  |
| Table S6. LCA inventory outputs of Plant A and Plant B normalized to 1,000,000 p.e./ day for scenarios 0: discharge without treatment, 1: conventional wastewater treatment plants and 2: biofactory wastewater circular economies. ....                                                      | 8  |
| Table S7. Type II SLCA stakeholder quantities per product system of Plant A and Plant B normalized to 1,000,000 p.e./ day for scenarios 0: discharge without treatment, 1: conventional wastewater treatment plants and 2: biofactory wastewater circular economies. ....                     | 9  |
| Table S8. Social Life Cycle Assessment Type II midpoint characterization inventories of Plant A and Plant B normalized to 1,000,000 p.e./ day for scenarios 0: discharge without treatment, 1: conventional wastewater treatment plants and 2: biofactory wastewater circular economies. .... | 10 |
| Table S9. Summary of the relationships between social impact categories, inventory categories and subcategories to relevant stakeholders [7]. ....                                                                                                                                            | 11 |
| Supplementary Data S1 .....                                                                                                                                                                                                                                                                   | 12 |
| Figure S1. Comparison of equal, entropy and ranked reciprocal weighted sum methods for overall sustainability impact.....                                                                                                                                                                     | 13 |

Table S1 Detailed technology descriptions implemented in Plant A and Plant B product systems.

| Product System       | Unit Process                      | Plant A                                                    | Plant B                                                    |
|----------------------|-----------------------------------|------------------------------------------------------------|------------------------------------------------------------|
| Water Treatment      | Primary treatment                 | 16 x 4,000 m <sup>3</sup> rectangular sedimentation tanks  | 12 x 5,000 m <sup>3</sup> circular sedimentation tanks     |
|                      | Waste Activated Sludge (WAS)      | 16 x 11,300 m <sup>3</sup> aerobic reactors                | 16 x 11,500 m <sup>3</sup> aerobic reactors                |
|                      |                                   | 16 x 6,000 m <sup>3</sup> circular clarification tanks     | 16 x 6,000 m <sup>3</sup> circular sedimentation tanks     |
|                      | Disinfection contact chambers     | 2 x 15,000 m <sup>3</sup> rectangular raceways             | 2 x 15,000 m <sup>3</sup> rectangular raceways             |
| Biosolids Production | Primary Sludge Thickening         | 4 x 7,000 m <sup>3</sup> circular gravitational thickeners | 6 x 1,500 m <sup>3</sup> circular gravitational thickeners |
|                      | Secondary Sludge Thickening       | 6 x 1,000 m <sup>3</sup> flotation thickeners              | 8 x 2.5 m wide table thickeners                            |
|                      | Pre-thickening Thermal Hydrolysis |                                                            | 6 x 1,500 m <sup>3</sup> gravitational pre-thickeners      |
|                      | Thermal Hydrolysis CAMBI          |                                                            | 2 x hydrolysis tanks, 6-11 bars, 140 °C                    |
|                      | Anaerobic Digestors               | 8 x 15,000 m <sup>3</sup> reactors                         | 7 x 14,000 m <sup>3</sup> reactors                         |
|                      | Centrifuge                        | 5 x 2,300 kg TS/ h centrifuges                             | 6 x 1,500 kg TS/ h centrifuges                             |
|                      | Gasometers                        | 2 x 27.5 m diameter                                        | 2 x 27.5 m diameter                                        |
| Biogas Production    | Biogas Scrubbers                  | 1 x 4,500 Nm <sup>3</sup> / h capacity                     | 2 x 4,500 Nm <sup>3</sup> / h capacity                     |
|                      | Biogas Carbon Dioxide Removal     | 1 x 4,500 Nm <sup>3</sup> / h capacity                     |                                                            |
| Nutrient Removal     | Coagulation-Flocculation          | 1 x 4,000 m <sup>3</sup> rectangular tank                  |                                                            |
|                      | Sequencing Batch Reactors         | 1 x 4,000 m <sup>3</sup> rectangular tank                  | 1 x 4,000 m <sup>3</sup> rectangular tank                  |
|                      | Anammox DEMON Reactors            | 1 x 4,000 m <sup>3</sup> rectangular tank                  | 1 x 4,000 m <sup>3</sup> rectangular tank                  |

Table S2. Normalized wastewater flow rates and substance concentrations of both influent and effluent for Plant A and Plant B for scenarios 0: discharge without treatment, 1: conventional WWTPs and 2: biofactory WW-CE [1].

|                                        |                          |                  | Influent Characteristics |           |           |                   |           |           | Effluent Characteristics |           |           |                   |           |           |
|----------------------------------------|--------------------------|------------------|--------------------------|-----------|-----------|-------------------|-----------|-----------|--------------------------|-----------|-----------|-------------------|-----------|-----------|
|                                        |                          |                  | Plant A Scenarios        |           |           | Plant B Scenarios |           |           | Plant A Scenarios        |           |           | Plant B Scenarios |           |           |
| Parameters                             |                          |                  | 0                        | 1         | 2         | 0                 | 1         | 2         | 0                        | 1         | 2*        | 0                 | 1         | 2         |
| Normalized Flows (m <sup>3</sup> / FU) | Description              | Q                | 131,395.1                | 129,391.3 | 130,823.0 | 153,745.3         | 155,767.5 | 156,685.8 | 131,395.1                | 125,724.5 | 127,115.6 | 153,745.3         | 144,686.4 | 145,539.3 |
| Substance Concentrations (mg/ L)       | Total Solids             | TS               | 351.99                   | 506.76    | 516.46    | 321.18            | 364.18    | 359.65    | 351.99                   | 26.46     | 30.40     | 321.18            | 12.87     | 14.22     |
|                                        | Volatile Solids          | VS               | 268.86                   | 384.81    | 394.21    | 266.60            | 296.99    | 294.27    | 268.86                   | 22.13     | 25.88     | 266.60            | 11.48     | 12.67     |
|                                        | Total Kjeldahl Nitrogen  | TKN              | 77.94                    | 98.72     | 74.03     | 71.58             | 83.94     | 72.30     | 77.94                    | 54.48     | 38.88     | 71.58             | 40.92     | 36.34     |
|                                        | Nitrate                  | NO <sup>3</sup>  | 0.00                     | 0.00      | 0.00      | 0.00              | 0.00      | 0.00      | 0                        | 0.87      | 0.73      | 0                 | 0.60      | 0.53      |
|                                        | Nitrite                  | NO <sup>2</sup>  | 0.00                     | 0.00      | 0.00      | 0.00              | 0.00      | 0.00      | 0                        | 0.44      | 0.48      | 0                 | 0.68      | 0.60      |
|                                        | Total Nitrogen           | TN               | 77.94                    | 98.72     | 77.00     | 71.58             | 83.94     | 72.30     | 77.94                    | 55.79     | 39.81     | 71.58             | 41.20     | 36.59     |
|                                        | Total Phosphorous        | TP               | 8.70                     | 9.98      | 8.93      | 7.09              | 8.84      | 7.84      | 8.70                     | 2.24      | 1.88      | 7.09              | 1.83      | 1.75      |
|                                        | Biological Oxygen Demand | BOD <sub>5</sub> | 338.67                   | 343.92    | 339.83    | 289.44            | 285.68    | 284.01    | 338.67                   | 17.68     | 19.19     | 289.44            | 17.81     | 17.96     |
|                                        | Chemical Oxygen Demand   | COD              | 616.19                   | 627.94    | 618.56    | 645.27            | 640.49    | 631.73    | 616.19                   | 52.83     | 58.99     | 645.27            | 55.27     | 56.99     |
|                                        | Chlorine                 | Cl               | 0.00                     | 0.00      | 0.00      | 0.00              | 0.00      | 0.00      | 0.00                     | 0.26      | 0.26      | 0.00              | 0.33      | 0.33      |
|                                        | Arsenic                  | As               | 0.0027                   | 0.0039    | 0.0039    | 0.0025            | 0.0028    | 0.0028    | 0.0027                   | 0.0002    | 0.0002    | 0.0025            | 0.0001    | 0.0001    |
|                                        | Cadmium                  | Cd               | 0.0005                   | 0.0007    | 0.0007    | 0.0004            | 0.0004    | 0.0004    | 0.0005                   | 0.0000    | 0.0000    | 0.0004            | 0.0000    | 0.0000    |
|                                        | Chromium                 | Cr               | 0.0456                   | 0.0656    | 0.0668    | 0.1058            | 0.1090    | 0.1077    | 0.0456                   | 0.0034    | 0.0039    | 0.1058            | 0.0042    | 0.0047    |
|                                        | Copper                   | Cu               | 0.1747                   | 0.2534    | 0.2578    | 0.3285            | 0.3386    | 0.3344    | 0.1747                   | 0.0155    | 0.0178    | 0.3285            | 0.0156    | 0.0172    |
|                                        | Mercury                  | Hg               | 0.0004                   | 0.0006    | 0.0006    | 0.0003            | 0.0004    | 0.0004    | 0.0004                   | 0.0000    | 0.0000    | 0.0003            | 0.0000    | 0.0000    |
|                                        | Molybdenum               | Mo               | 0.0038                   | 0.0055    | 0.0056    | 0.0054            | 0.0061    | 0.0061    | 0.0038                   | 0.0003    | 0.0003    | 0.0054            | 0.0002    | 0.0002    |
|                                        | Nickle                   | Ni               | 0.0156                   | 0.0225    | 0.0229    | 0.0249            | 0.0157    | 0.0155    | 0.0156                   | 0.0012    | 0.0014    | 0.0249            | 0.0010    | 0.0011    |
|                                        | Lead                     | Pb               | 0.0146                   | 0.0211    | 0.0214    | 0.0152            | 0.0164    | 0.0162    | 0.0146                   | 0.0011    | 0.0013    | 0.0152            | 0.0006    | 0.0007    |
|                                        | Selenium                 | Se               | 0.0010                   | 0.0015    | 0.0015    | 0.0009            | 0.0011    | 0.0010    | 0.0010                   | 0.0001    | 0.0001    | 0.0009            | 0.00004   | 0.00004   |
|                                        | Zinc                     | Zn               | 0.4038                   | 0.5834    | 0.5936    | 0.3685            | 0.3798    | 0.3751    | 0.4038                   | 0.0331    | 0.0381    | 0.3685            | 0.0161    | 0.0178    |
|                                        | Iron                     | Fe               | 0.0079                   | 0.0114    | 0.0116    | 0.0072            | 0.0063    | 0.0062    | 0.0079                   | 0.0006    | 0.0007    | 0.0072            | 0.0003    | 0.0003    |
|                                        | Calcium                  | Ca               | 20.3237                  | 29.2445   | 29.7547   | 18.5451           | 19.1164   | 18.8785   | 20.3237                  | 1.5280    | 1.7555    | 18.5451           | 0.7429    | 0.8211    |
|                                        | Magnesium                | Mg               | 2.7475                   | 3.9534    | 4.0224    | 2.4975            | 2.5744    | 2.5424    | 2.7475                   | 0.2066    | 0.2373    | 2.4975            | 0.1000    | 0.1106    |
|                                        | Manganese                | Mn               | 0.1672                   | 0.2395    | 0.2438    | 0.1526            | 0.1018    | 0.1005    | 0.1672                   | 0.0118    | 0.0136    | 0.1526            | 0.0058    | 0.0064    |

\*Not including water recovery

Table S3. Normalized biosolid flow rates and substance concentrations for Plant A and Plant B for scenarios 0: discharge without treatment, 1: conventional WWTPs and 2: biofactory WW-CE [1].

| Parameters                             |                  | Plant A Scenarios |           | Plant B Scenarios |           |
|----------------------------------------|------------------|-------------------|-----------|-------------------|-----------|
|                                        |                  | 1                 | 2         | 1                 | 2         |
| Normalized Flows (m <sup>3</sup> / FU) | Q                | 100.16            | 100.16    | 131.15            | 132.39    |
| Substance Concentrations (mg/L)        | TS               | 202245.94         | 215142.51 | 196432.27         | 202245.94 |
|                                        | VS               | 123572.27         | 133123.13 | 117458.08         | 129293.38 |
|                                        | TN (TKN)         | 11366.22          | 8570.55   | 7250.86           | 7737.80   |
|                                        | TP               | 3076.95           | 2672.56   | 5617.12           | 2009.89   |
|                                        | BOD <sub>5</sub> | 196026.00         | 171690.96 | 152376.80         | 128943.03 |
|                                        | COD              | 370948.98         | 371677.31 | 395834.80         | 325788.59 |
|                                        | Cl               | 0.00              | 0.00      | 0.00              | 0.00      |
|                                        | As               | 1.54              | 1.64      | 1.51              | 1.56      |
|                                        | Cd               | 0.24              | 0.26      | 0.22              | 0.23      |
|                                        | Cr               | 23.82             | 25.34     | 58.81             | 60.55     |
|                                        | Cu               | 91.25             | 97.07     | 182.64            | 188.05    |
|                                        | Hg               | 0.22              | 0.24      | 0.20              | 0.21      |
|                                        | Mo               | 2.18              | 2.32      | 3.32              | 3.41      |
|                                        | Ni               | 5.00              | 5.31      | 8.46              | 8.71      |
|                                        | Pb               | 8.01              | 8.52      | 8.84              | 9.10      |
|                                        | Se               | 0.59              | 0.62      | 0.57              | 0.59      |
|                                        | Zn               | 210.94            | 224.39    | 204.88            | 210.94    |
|                                        | Fe               | 3.50              | 3.73      | 3.40              | 3.50      |
|                                        | Ca               | 10616.09          | 11293.05  | 10310.93          | 10616.09  |
|                                        | Mg               | 1435.14           | 1526.65   | 1388.58           | 1429.68   |
|                                        | Mn               | 56.51             | 60.11     | 54.88             | 56.51     |

Table S4. Capital investment and maintenance costs of Plant A and Plant B normalized to 1,000,000 p.e./ day for scenarios 0: discharge without treatment, 1: conventional wastewater treatment plants and 2: biofactory wastewater circular economies.

| Input                                              | Product System     | Unit/ FU | Plant A Scenarios |        | Plant B Scenarios |         | Sources  |
|----------------------------------------------------|--------------------|----------|-------------------|--------|-------------------|---------|----------|
|                                                    |                    |          | 1                 | 2      | 1                 | 2       |          |
| Capital Investment<br>Civil Works and<br>Equipment | Water Treatment    | \$USD    | 74,522            | 76,038 | 158,312           | 159,246 | [1], [2] |
|                                                    | Sludge Treatment   |          | 42,312            | 42,780 | 60,058            | 79,545  |          |
|                                                    | Biosolids Recovery |          | 0                 | 12,680 | 0.00              | 18,301  |          |
|                                                    | Biogas Recovery    |          | 0                 | 5,692  | 0.00              | 18,368  |          |
|                                                    | Anammox            |          | 0                 | 21,844 | 0.00              | 23,887  |          |
| Maintenance Costs<br>Civil Works and<br>Equipment  | Water Treatment    |          | 775               | 791    | 1,200             | 1,106   |          |
|                                                    | Sludge Treatment   |          | 844               | 853    | 1,083             | 1,640   |          |
|                                                    | Biosolids Recovery |          | 0                 | 142    | 0                 | 136     |          |
|                                                    | Biogas Recovery    |          | 0                 | 234    | 0                 | 844     |          |
|                                                    | Anammox            |          | 0                 | 227    | 0                 | 166     |          |

*Table S5. Integrated LCA and LCC inventories of Plant A and Plant B normalized to 1,000,000 p.e./ day for scenarios 0: discharge without treatment, 1: conventional wastewater treatment plants and 2: biofactory wastewater circular economies.*

| Inputs/ Outputs                | Product System         | Inventory Description      | Unit/ FU | Plant A Scenarios |         | Plant B Scenarios |         | Source | LCC Prices  | Plant A Scenarios |         | Plant B Scenarios |         | Source     |
|--------------------------------|------------------------|----------------------------|----------|-------------------|---------|-------------------|---------|--------|-------------|-------------------|---------|-------------------|---------|------------|
|                                |                        |                            |          | 1                 | 2       | 1                 | 2       |        | \$USD/ Unit | 1                 | 2       | 1                 | 2       |            |
| Chemicals                      | Water                  | Influent                   | m³       | 129,936           | 131,694 | 155,767           | 156,686 | [1]    | 0.854       | 110,970           | 112,470 | 133,030           | 133,810 | [1]        |
|                                |                        | Chlorine                   | kg       | 579               | 636     | 890               | 890     |        | 0.68        | 394               | 433     | 605               | 605     |            |
|                                | Sludge                 | Polymers                   |          | 1,064             | 1,039   | 395               | 790     |        | 4.62        | 4,916             | 4,800   | 1,826             | 3,648   |            |
|                                |                        | Ferric Chloride            |          | 233               | 242     | 0                 | 0       |        | 739.51      | 172,306           | 178,961 | 0                 | 0       |            |
|                                | Energy Recovery        | Caustic Soda               |          | 0                 | 1,007   | 0                 | 1,921   |        | 0.00344     | 0                 | 3.5     | 0                 | 6.6     |            |
|                                |                        | Nutrients                  |          | 0                 | 5       | 0                 | 2       |        | 3.3         | 0                 | 16.5    | 0                 | 5.9     |            |
|                                |                        | Activated Carbon           |          | 0                 | 16.5    | 0                 | 0       | [3]    | 0.28        | 0                 | 46.2    | 0                 | 0       |            |
|                                |                        | Refrigerant                |          | 0                 | 0       | 0                 | 701     | [1]    | 31.16       | 0                 | 0       | 0                 | 21,843  |            |
|                                |                        | Motor Oil                  |          | 0                 | 0       | 0                 | 124     |        | 12.15       | 0                 | 0       | 0                 | 1,507   |            |
|                                | Nitrogen Abatement     | Sulfuric Acid              |          | 0                 | 1,047   | 0                 | 66      | [4]    | 0.7         | 0                 | 733     | 0                 | 46      |            |
|                                |                        | Caustic Soda               |          | 0                 | 748     | 0                 | 0       |        | 0.00344     | 0                 | 2.6     | 0                 | 0       |            |
|                                |                        | Ferric Chloride            |          | 0                 | 3       | 0                 | 0       |        | 739.51      | 0                 | 2,219   | 0                 | 0       |            |
|                                |                        | Magnesium Oxide            |          | 0                 | 0       | 0                 | 286     |        | 0.66        | 0                 | 0       | 0                 | 189     |            |
| Energy                         | Water                  | Activated Sludge           | kWh      | 25,669            | 27,396  | 31,996            | 32,975  | [1]    | 0.0075      | 192.5             | 205.5   | 239.9             | 247.3   | Assumption |
|                                | Sludge                 | Thickening                 |          | 2,294             | 2,427   | 2,866             | 2,969   | [3]    | 0.0075      | 17.2              | 18.2    | 21.5              | 22.3    |            |
|                                |                        | Anaerobic Digestion        |          | 17,052            | 18,040  | 17,676            | 18,308  | [1]    | 0.0075      | 127.89            | 135.3   | 132.6             | 137.3   |            |
|                                |                        | Centrifuge                 |          | 1,529             | 1,618   | 1,911             | 1,979   | [3]    | 0.0075      | 11.47             | 12.14   | 14.3              | 14.8    |            |
|                                |                        | THP                        |          | 0                 | 0       | 0                 | 11,875  |        | 0.0075      | 0                 | 0       | 0                 | 89.1    |            |
|                                | Energy Recovery        | Biogas Upgrading (H2S)     |          | 0                 | 3,291   | 0                 | 2,944   | [5]    | 0.0075      | 0                 | 24.68   | 0                 | 22.1    |            |
|                                |                        | Biogas Methanization (CO2) |          | 0                 | 2,962   | 0                 | 0       |        | 0.0075      | 0                 | 22.22   | 0                 | 0       |            |
|                                |                        | Biomethane Gas to Grid     |          | 0                 | 7,618   | 0                 | 0       | [1]    | 0.0075      | 0                 | 57.12   | 0                 | 0       |            |
|                                | Nitrogen Abatement     | Anammox                    |          | 0                 | 1,250   | 0                 | 3,010   | [3]    | 0.0075      | 0                 | 9.375   | 0                 | 22.6    |            |
| Transport and Waste Transport* | Water Treatment        | Cl <sub>2</sub>            | t-km     | 208               | 222     | 508               | 511     | [1]    | 0           |                   |         |                   |         | [1]        |
|                                | Biosolids Management * | Biosolids Landfill         | kg       | 20,256            | 5,130   | 25,762            | 3,350   |        | 47          | 151,920           | 38,475  | 193,215           | 25,125  |            |
|                                |                        | Biosolids Agriculture      |          | 0                 | 15,400  | 0                 | 22,413  |        | 7.5         | 0                 | 115,500 | 0                 | 168,100 |            |

|                               |                      |                                |                |   |        |   |        |  |        |   |        |   |       |            |
|-------------------------------|----------------------|--------------------------------|----------------|---|--------|---|--------|--|--------|---|--------|---|-------|------------|
|                               | Energy Recovery      | NaOH                           | t-km           |   | 612    |   | 1434   |  | 0      | 0 | 0      | 0 | 0     |            |
|                               |                      | Nutrients (Glucose)            |                |   | 6      |   | 2      |  | 0      | 0 | 0      | 0 | 0     |            |
|                               |                      | AC                             |                |   | 9      |   |        |  | 0      | 0 | 0      | 0 | 0     |            |
|                               |                      | Refrigerant                    |                |   |        |   | 418    |  | 0      | 0 | 0      | 0 | 0     |            |
|                               |                      | Motor Oil Lubricant            |                |   |        |   | 71     |  | 0      | 0 | 0      | 0 | 0     |            |
|                               | Nitrogen Removal     | H <sub>2</sub> SO <sub>4</sub> |                |   |        |   | 2      |  | 0      | 0 | 0      | 0 | 0     |            |
|                               |                      | MgO                            |                |   |        |   | 378    |  | 0      | 0 | 0      | 0 | 0     |            |
|                               |                      | FeCl <sub>3</sub>              |                |   | 463    |   |        |  | 0      | 0 | 0      | 0 | 0     |            |
|                               |                      | NaOH                           |                |   | 599    |   |        |  | 0      | 0 | 0      | 0 | 0     |            |
| Products and avoided products | Water                | Treated Effluent               | m <sup>3</sup> | 0 | 26,340 | 0 | 0      |  | 0.854  | 0 | 22,493 | 0 | 0     |            |
|                               | Biosolids Management | Fertilizer                     | Kg             | 0 | 7,700  | 0 | 11,207 |  | 0.65   | 0 | 5,005  | 0 | 7,285 | [6]        |
|                               | Energy Recovery      | Natural Gas                    | kg             | 0 | 31,355 | 0 | 0      |  | 0.132  | 0 | 4,160  | 0 | 0     | [1]        |
|                               |                      | Electricity                    | kWh            | 0 | 18,040 | 0 | 66,083 |  | 0.0075 | 0 | 0      | 0 | 496   | Assumption |

Table S6. LCA inventory outputs of Plant A and Plant B normalized to 1,000,000 p.e./ day for scenarios 0: discharge without treatment, 1: conventional wastewater treatment plants and 2: biofactory wastewater circular economies.

|                         |                  |                              |         | Plant A Scenarios |        | Plant B Scenarios |        |                                         |
|-------------------------|------------------|------------------------------|---------|-------------------|--------|-------------------|--------|-----------------------------------------|
| Outputs                 | System           | Description                  | Unit/FU | 1                 | 2      | 1                 | 2      | Sources                                 |
| <b>Emissions to Air</b> | All              | CO <sub>2</sub>              | kg      | 16620             | 17184  | 28800             | 6490   | Table E.3 and E.6<br>Supplementary Data |
|                         |                  | CO <sub>2</sub> Biogenic     |         | 124200            | 125270 | 209100            | 192982 |                                         |
|                         |                  | CO                           |         | 0                 | 0      | 0                 | 3      |                                         |
|                         |                  | CH <sub>4</sub> Biogenic     |         | 24208             | 25306  | 25784             | 25029  |                                         |
|                         |                  | NO <sub>x</sub>              |         | 0                 | 0      | 1                 | 3      |                                         |
|                         |                  | PM                           |         | 3                 | 2      | 4                 | 1      |                                         |
|                         |                  | H <sub>2</sub> S             |         | 310               | 0      | 368               | 0      |                                         |
|                         |                  | N-NO <sub>2</sub>            |         | 76                | 99     | 91                | 70     |                                         |
| <b>Energy</b>           | Sludge Treatment | Anaerobic Digester Boiler    | kWh     |                   | 17076  |                   | 18627  | [1]                                     |
|                         | Energy Recovery  | DBM Supply                   |         |                   | 31355  |                   |        |                                         |
|                         |                  | Electricity CHP Self-Supply  |         |                   |        |                   | 32692  |                                         |
|                         |                  | Electricity Injected to Grid |         |                   |        |                   | 4458   |                                         |
|                         |                  | Heat Recovery THP Boiler     |         |                   |        |                   | 10306  |                                         |



Table S7. Type II SLCA stakeholder quantities per product system of Plant A and Plant B normalized to 1,000,000 p.e./ day for scenarios 0: discharge without treatment, 1: conventional wastewater treatment plants and 2: biofactory wastewater circular economies.

| Stakeholder                                                 | Product System       | Description           | Plant A Scenarios |           | Plant B Scenarios |           |
|-------------------------------------------------------------|----------------------|-----------------------|-------------------|-----------|-------------------|-----------|
|                                                             |                      |                       | 1                 | 2         | 1                 | 2         |
| Workers                                                     | Water                |                       | 8                 | 11        | 14                | 19        |
|                                                             | Sludge               |                       | 8                 | 11        | 14                | 19        |
|                                                             | Biosolids Management |                       | 0                 | 1         | 0                 | 1         |
|                                                             | Energy               |                       | 0                 | 2         | 0                 | 1         |
|                                                             | Anammox              |                       | 0                 | 0         | 0                 | 0         |
| Local Community                                             | Water                | Community 1           | 248               | 248       | 9                 | 9         |
|                                                             |                      | Community 2           | 579               | 579       | 112               | 112       |
|                                                             |                      | Community 3           | 6,617             | 6,617     | 0                 | 0         |
|                                                             |                      | Laundry Service       | 0                 | 1         | 0                 | 0         |
|                                                             |                      | Clothes Recycling     | 0                 | 1         | 0                 | 0         |
|                                                             |                      | Water Provider        | 0                 | 1         | 0                 | 0         |
|                                                             | Biosolids            | Community 1           | 0                 | 496       | 0                 | 398       |
|                                                             |                      | Community 2           | 0                 | 33        | 0                 | 27        |
| Children                                                    | All                  | Local Communities     | 1,861             | 1,901     | 30                | 136       |
|                                                             |                      | School Supplies       | 191               | 191       | 268               | 268       |
|                                                             |                      | School Visits         | 1,006             | 791       | 1,414             | 1,112     |
|                                                             |                      | School Education      | 2,188             | 9,429     | 3,076             | 13,253    |
| Farmers                                                     | Water                |                       | 0                 | 34        | 0                 | 0         |
|                                                             | Biosolids            |                       | 0                 | 66        | 0                 | 93        |
| Clients                                                     | Water                | Population Equivalent | 1,000,000         | 1,000,000 | 1,000,000         | 1,000,000 |
|                                                             | Energy               | Gas Company           | 0                 | 496       | 0                 | 0         |
| VCA (Maintenance, Laboratory, Chemicals, Transport, Energy) | Water                | Total                 | 1.2               | 1.2       | 1.6               | 1.6       |
|                                                             | Sludge               | Total                 | 1.3               | 1.3       | 1.6               | 1.6       |
|                                                             | Biosolids            | Total                 | 0.2               | 0.2       | 0.2               | 0.2       |
|                                                             | Energy               | Total                 | 0.0               | 0.7       | 0.0               | 0.7       |
|                                                             | Anammox              | Total                 | 0.0               | 0.8       | 0.0               | 0.9       |
| Society                                                     | All                  | Metropolitan Region   | 1,164,046         | 1,134,271 | 1,636,169         | 1,594,317 |

Table S8. Social Life Cycle Assessment Type II midpoint characterization inventories of Plant A and Plant B normalized to 1,000,000 p.e./ day for scenarios 0: discharge without treatment, 1: conventional wastewater treatment plants and 2: biofactory wastewater circular economies.

|                               |                                               |                                                                 |                            | Plant A Scenarios |           | Plant B Scenarios |          |
|-------------------------------|-----------------------------------------------|-----------------------------------------------------------------|----------------------------|-------------------|-----------|-------------------|----------|
| Impact Category               | Subcategory Description                       | Indicator                                                       | Measure/Stakeholder/<br>FU | 1                 | 2         | 1                 | 2        |
| Working Conditions            | Equal Opportunities \$                        | Training                                                        | Hours                      | 0.16              | 6.67      | 0.26              | 4.16     |
|                               |                                               | Fair Wage                                                       | %                          | 73.58             | 96.00     | 99.16             | 140.99   |
|                               | Inclusion %                                   | Gender Equality                                                 | %                          | 3.71              | 3.54      | 6.29              | 4.27     |
|                               |                                               | Indigenous                                                      | %                          | 0.00              | 0.00      | 0.00              | 0.00     |
|                               |                                               | Disability                                                      | %                          | 0.00              | 0.41      | 0.00              | 0.25     |
|                               | Health and Safety (\$)                        | Accidents                                                       | $Days_{Lost}$              | -137.71           | -68.13    | -233.42           | -91.40   |
|                               |                                               | Training Health and Safety                                      | Hours                      | 3.38              | 12.90     | 5.72              | 11.59    |
|                               | Risk                                          | Risk Level                                                      | Risk                       | -516.15           | -555.92   | -519.74           | -1310.91 |
| Socio-cultural Responsibility | Access to Immaterial Resources and Security % | Local Jobs/ VCA                                                 | %                          | 19.21             | 30.60     | 31.76             | 39.02    |
|                               |                                               | Promotion of Corporate Social Responsibility (CSR) with VCA     | %                          | 0.00              | 0.00      | 0.00              | 0.00     |
|                               | Investigation and Development \$              | Investigations and Development                                  | \$                         | 0.00              | 408.34    | 0.00              | 573.95   |
|                               | Education \$                                  | Education                                                       | Hours                      | 1.84              | 16.08     | 4.05              | 34.05    |
|                               |                                               | Participation in Farmers Organization                           | Hours                      | 0.00              | 0.00      | 0.00              | 0.00     |
|                               |                                               | Contribution to Preservation of Culture                         | Hours                      | 0.00              | 0.00      | 0.00              | 0.00     |
|                               |                                               | Community Initiatives and Corporate Social Responsibility (CSR) | \$                         | 59.55             | 218.09    | 16.08             | 60.19    |
| Environmental Responsibility  | Access to Material Resources (\$)             | Infrastructure with Community Access                            | \$                         | 22.33             | 22687.61  | 48.36             | 1353.71  |
|                               |                                               | Quality Assurance and Crop Yield                                | %                          | 100.00            | 220.00    | 100.00            | 120.00   |
|                               |                                               | End of Life Management                                          | %                          | 0.00              | 135.00    | 0.00              | 163.00   |
|                               | Data (\$)                                     | Legislative Compliance                                          | $N_{Events}$               | -11.91            | -0.71     | -0.19             | -0.11    |
|                               |                                               | Data Monitoring                                                 | Hours                      | 7.00              | 9.02      | 7.00              | 7.49     |
|                               |                                               | Management Systems                                              | $N_{Systems}$              | 42.00             | 84.00     | 42.00             | 84.00    |
|                               | Conservation (Ha)                             | Contribution to Ecological Conservation                         | Ha                         | 2.23              | 2.23      | 0.04              | 0.04     |
| Governance                    | Feedback Mechanisms (\$)                      | Feedback Mechanisms                                             | Hours                      | 1.95              | 65.92     | 7.49              | 49.93    |
|                               |                                               | Complaints                                                      | $N_{Complaints}$           | -6252.80          | -20637.78 | -29.02            | -148.90  |
|                               | Engagement (\$)                               | Inclusion of first nations                                      | Hours                      | 0.00              | 0.00      | 0.00              | 0.00     |
|                               |                                               | Engagement                                                      | Hours                      | 447.03            | 750.07    | 3.02              | 10.77    |
|                               | Collective Bargaining (%)                     | Collective Bargaining                                           | %                          | 6.58              | 9.67      | 11.16             | 14.87    |

Table S9. Summary of the relationships between social impact categories, inventory categories and subcategories to relevant stakeholders [7].

| Impact Category               | Abbreviation | Inventory Subcategory             | Inventory Subcategory Indicators        | Monetized Factors (USD/ Unit) | Unit/ FU                | W | LC | F | VC A | C | S |
|-------------------------------|--------------|-----------------------------------|-----------------------------------------|-------------------------------|-------------------------|---|----|---|------|---|---|
| Working Conditions            | WC           | Equal Opportunities (\$)          | Training                                | 2                             | Hours                   | ✓ |    |   |      |   |   |
|                               |              |                                   | Fair Wage                               | 2                             | %                       | ✓ |    |   |      |   |   |
|                               |              | Inclusion (%)                     | Gender Equality                         | 1                             | %                       | ✓ |    |   |      |   |   |
|                               |              |                                   | Indigenous                              | 1                             | %                       | ✓ |    |   |      |   |   |
|                               |              |                                   | Disability                              | 1                             | %                       | ✓ |    |   |      |   |   |
|                               |              | Health and Safety (\$)            | Accidents*                              | 12                            | Days <sub>Lost</sub>    | ✓ |    |   |      |   |   |
|                               |              |                                   | Training Health and Safety              | 2                             | Hours                   | ✓ |    |   |      |   |   |
|                               |              | Risk                              | Risk Level*                             | 1                             | Risk                    | ✓ |    |   |      |   |   |
| Socio-cultural Responsibility | SR           | Access to Immaterial (%)          | Local Jobs/ VCA                         | 1                             | %                       |   | ✓  |   | ✓    |   |   |
|                               |              |                                   | Promotion of CSR                        | 1                             | %                       |   |    |   |      |   |   |
|                               |              | Technology (\$)                   | Investigations and Development          | 1                             | \$                      |   |    |   |      |   | ✓ |
|                               |              | Education (\$)                    | Education                               | 2                             | Hours                   |   | ✓  | ✓ | ✓    |   |   |
|                               |              |                                   | Participation in Farmers Organization   | 2                             | Hours                   |   |    | ✓ |      |   |   |
|                               |              |                                   | Contribution to Preservation of Culture | 2                             | Hours                   |   | ✓  |   |      |   |   |
|                               |              |                                   | Community Initiatives and CSR           | 1                             | \$                      |   | ✓  |   |      |   |   |
|                               |              |                                   |                                         |                               |                         |   |    |   |      |   |   |
| Environmental Responsibility  | ER           | Access to Material Resources (\$) | Infrastructure with Community Access    | 1                             | \$                      |   | ✓  |   |      |   |   |
|                               |              |                                   | Quality Assurance and Crop Yield        | 1                             | %                       |   |    | ✓ |      | ✓ |   |
|                               |              |                                   | End of Life Management                  | 1                             | %                       |   |    |   |      | ✓ |   |
|                               |              | Data (\$)                         | Legislative Compliance*                 | 80                            | N <sub>Events</sub>     |   | ✓  |   |      |   |   |
|                               |              |                                   | Data Monitoring                         | 2                             | Hours                   |   | ✓  |   |      | ✓ |   |
|                               |              |                                   | Management Systems                      | 14                            | N <sub>Systems</sub>    |   |    |   |      |   | ✓ |
|                               |              | Conservation (Ha)                 | Contribution to Ecological Conservation | 1                             | Ha                      |   | ✓  |   |      |   |   |
| Public Governance             | PG           | Feedback Mechanisms (\$)          | Feedback Mechanisms                     | 2                             | Hours                   |   | ✓  | ✓ | ✓    | ✓ |   |
|                               |              |                                   | Complaints*                             | 12                            | N <sub>Complaints</sub> |   |    |   |      |   |   |
|                               |              | Engagement (Hours)                | Inclusion of First Nations              | 1                             | Hours                   |   |    | ✓ |      |   |   |
|                               |              |                                   | Engagement                              | 1                             | Hours                   |   | ✓  | ✓ | ✓    |   |   |
|                               |              | Collective Bargaining (%)         | Unionized workers                       | 1                             | %                       | ✓ |    |   |      |   |   |

\*Measures/ activity variables considered negative values to represent social risk

*Supplementary Data S1*

[Link to LCSA WW-CE survey Spanish](#)

Figure S1. Comparison of equal, entropy and ranked reciprocal weighted sum methods for overall sustainability impact.

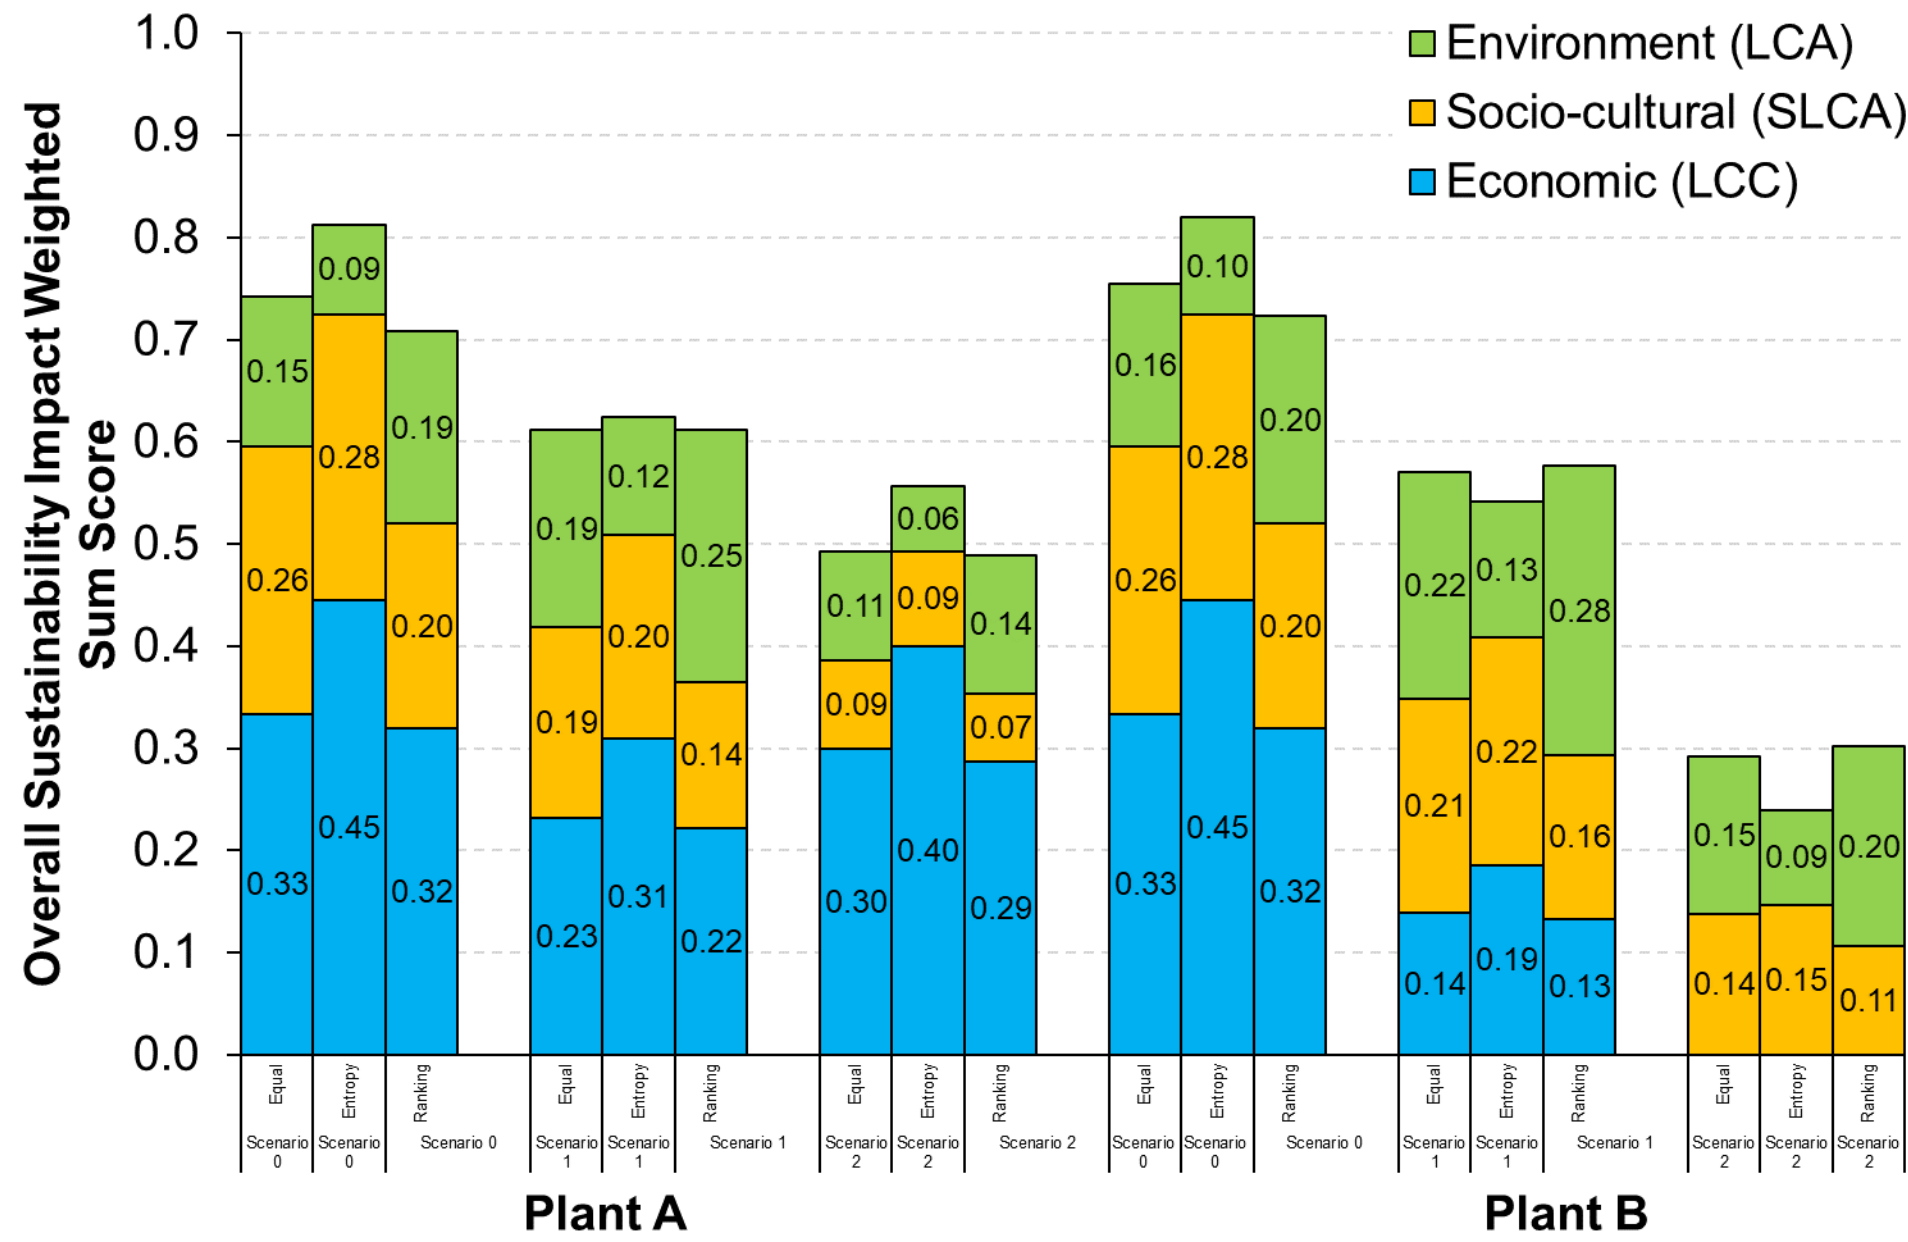

## References

- [1] LWC, "Operational Data," Santiago, 2019.
- [2] D. Vineyard, A. Hicks, K. G. Karthikeyan, and P. Barak, "Economic analysis of electrodialysis, denitrification, and anammox for nitrogen removal in municipal wastewater treatment," *J. Clean. Prod.*, vol. 262, p. 121145, 2020, doi: 10.1016/j.jclepro.2020.121145.
- [3] N. Mills *et al.*, "Second Generation Thermal Hydrolysis Processes," *Proc. Water Environ. Fed.*, vol. 2014, no. 2, pp. 1–13, 2015, doi: 10.2175/193864714816196925.
- [4] R. C. Maggi, "Implementacion de Tecnologias Anammox en Biofactorias," Valparaiso, 2017.
- [5] F. Ardolino, G. F. Cardamone, F. Parrillo, and U. Arena, "Biogas-to-biomethane upgrading: A comparative review and assessment in a life cycle perspective," *Renew. \& Sustain. ENERGY Rev.*, vol. 139, 2021, doi: 10.1016/j.rser.2020.110588.
- [6] ODEPA, "Evolucion de precios de fertilizantes internacional, importacion y nacional al mes de junio 2023," *Reporte Interactivo de Precios de Fertilizantes*, 2023. [https://apps.odepa.gob.cl/powerBI/reporte\\_fertilizantes.html](https://apps.odepa.gob.cl/powerBI/reporte_fertilizantes.html) (accessed Aug. 11, 2023).
- [7] SETAC, "Guidelines for Social Life Cycle Assessment of Products," *Management*, vol. 15, no. 2, p. 104, 2020, [Online]. Available: [http://www.unep.fr/shared/publications/pdf/DITx1164xPA-guidelines\\_sLCA.pdf](http://www.unep.fr/shared/publications/pdf/DITx1164xPA-guidelines_sLCA.pdf)
